# Supplementary material for: Catalytic oxidation of CO by N2O on neutral Y2MO5 (M = Y, Al) clusters: a density functional theory study
Source: Royal Society of Chemistry journal article supplement (doi:10.1039/c5ra11695c), 2015-01-01
Supplement: c5ra11695c1.pdf [file c5ra11695c1.pdf]

## Supplementary Information

### Catalytic Oxidation of CO by N<sub>2</sub>O on the Neutral Y<sub>2</sub>MO<sub>5</sub> (M = Y, Al) Clusters:

#### A Density Functional Theory Study

Hong-Ling Fang<sup>a</sup>, Lei Xu<sup>a</sup>, Jia Li<sup>a</sup>, Bin Wang<sup>a</sup>, Yong-Fan Zhang<sup>a,b,c,\*</sup>, Xin Huang<sup>a,b,\*</sup>

<sup>a</sup>College of Chemistry, Fuzhou University, Fuzhou, Fujian 350116, PR China

<sup>b</sup>Fujian Provincial Key Laboratory of Theoretical and Computational Chemistry, Xiamen, Fujian 361005, PR China

<sup>c</sup>State Key Laboratory of Photocatalysis on Energy and Environment, Fuzhou University, Fuzhou, 350002, PR China

\*Corresponding author. Tel.: +86 591 22866139; fax: +86 591 22866156.

E-mail address: [xhuang@fzu.edu.cn](mailto:xhuang@fzu.edu.cn) (X. Huang); [zhangyf@fzu.edu.cn](mailto:zhangyf@fzu.edu.cn) (Y. F. Zhang)

**Fig. S1** Isomeric structures and their relative energies 0.40 eV above the ground state for Y<sub>3</sub>O<sub>x</sub> ( $x = 4-5$ ).

**Fig. S2** Isomeric structures and their relative energies 0.40 eV above the ground state for Y<sub>2</sub>AlO<sub>x</sub> ( $x = 4-5$ ).

**Figs. S3–S4** Calculated energy profile for the reaction of Y<sub>3</sub>O<sub>5</sub> cluster with CO<sub>2</sub>. The reactants, intermediates, transition states and products of the reaction are denoted as R, IM<sub>m</sub>, TS<sub>n</sub> and P, respectively. The energies (given in eV) are relative to the entrance channel. Some key bond lengths are given in angstroms.

**Figs. S5–S7** Calculated energy profile for the reaction of Y<sub>2</sub>AlO<sub>5</sub> with CO. The reactants, intermediates, transition states and products of the reaction are denoted as R, IM<sub>m</sub>, TS<sub>n</sub> and P, respectively. The energies (given in eV) are relative to the entrance channel. Some key bond lengths are given in angstroms.

**Fig. S8** Spin distribution for the structures of Y<sub>3</sub>O<sub>5</sub> reacting with CO.

**Fig. S9** Spin distribution for the structures of Y<sub>2</sub>AlO<sub>5</sub> reacting with CO.

**Fig. S10** DFT calculated molecular electrostatic potential maps (MEPs) for CO, CO<sub>2</sub> and Y<sub>2</sub>MO<sub>x</sub> (M = Y, Al;  $x = 4-5$ ) clusters. Natural charge distributions for these clusters are given in e.

**Figs. S11–S12** Calculated the reaction of  $Y_2AlO_4$  with  $N_2O$ . The reactants, intermediates, transition states and produces of the reaction are denoted as R, *IMm*, *TSn* and P, respectively. The energies (given in eV) are relative to the entrance channel. Some key bond lengths are given in angstroms.

**Table S1** Relative energies of the low-lying states of the  $Y_2AlO_x$  ( $x = 4-5$ ) clusters at the BP86 level (within 0.20 eV), and comparisons with those from the CCSD(T) single-point calculations at the BP86 geometries.

**Table S2** Cartesian coordinates for all the optimized structures within 0.40 eV for  $Y_3O_x$  and  $Y_2AlO_x$  ( $x = 4-5$ ) at the BP86/Y/Stuttgart+2f1g/O/Al/aug-cc-pvTZ level of theory.

**Table S3** Cartesian coordinates for all the optimized structures shown in the energy profiles of Figs. 5–6, 8–9 at the BP86/Y/Stuttgart+2f1g/O/Al/C/N/aug-cc-pvTZ level of theory.



Fig. S3

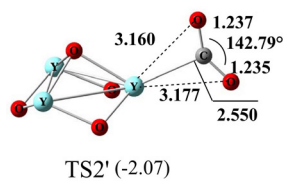

Fig. S4

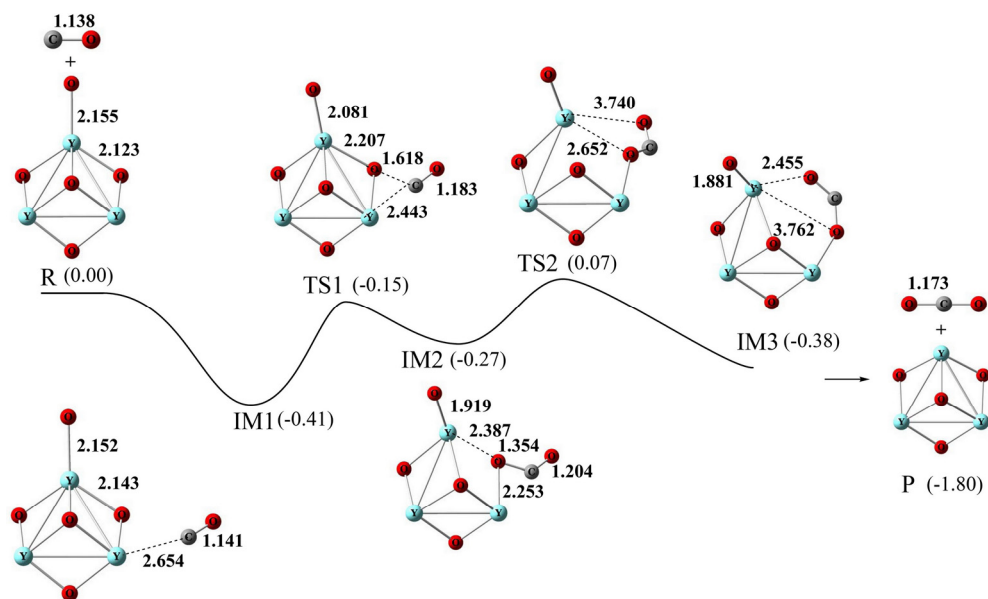

Fig. S5

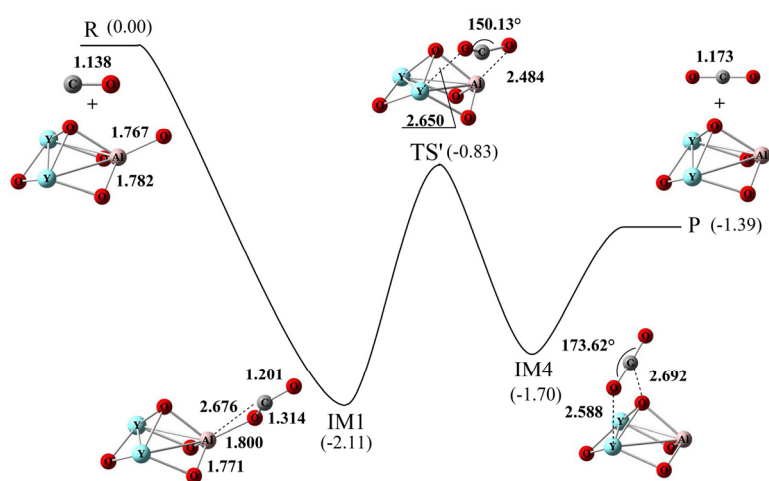

Fig. S6

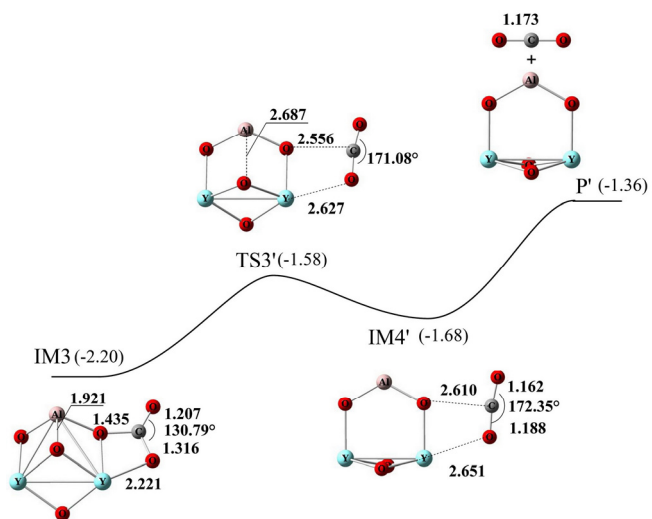

Fig. S7

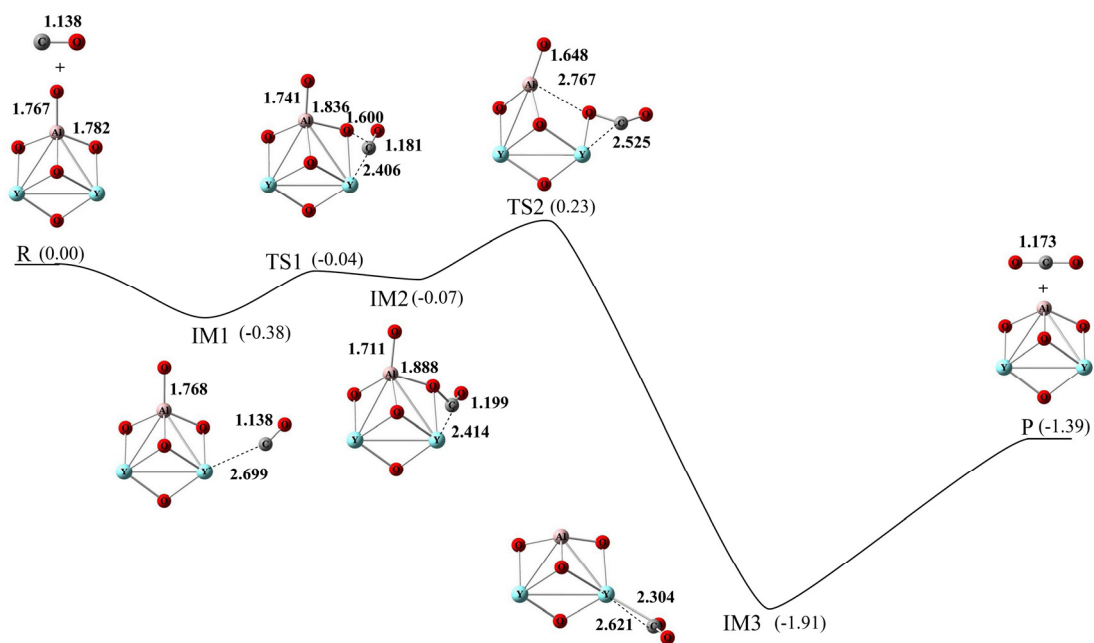

Fig. S8

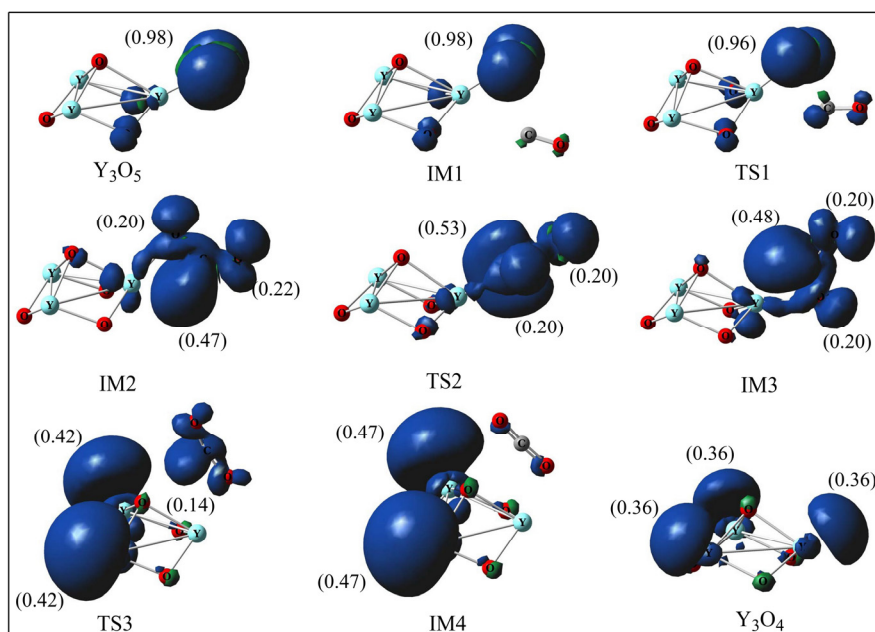

Fig. S9

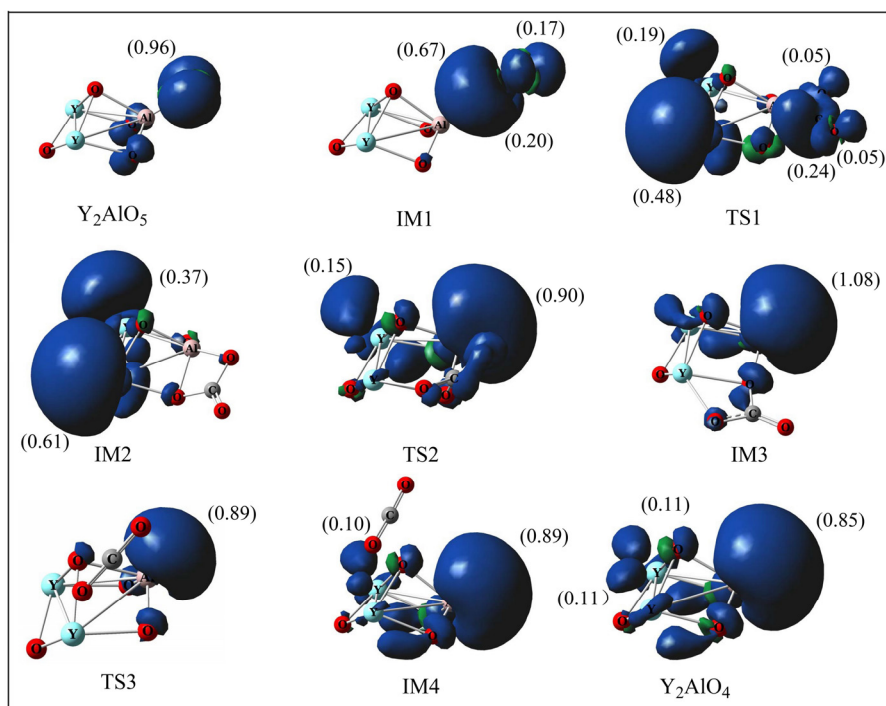

**Fig. S10**

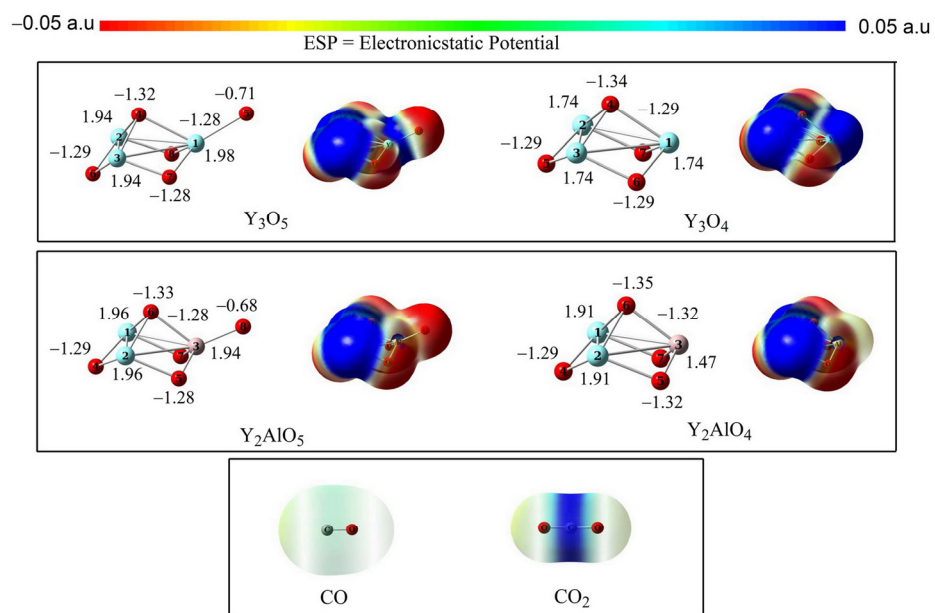

**Fig. S11**

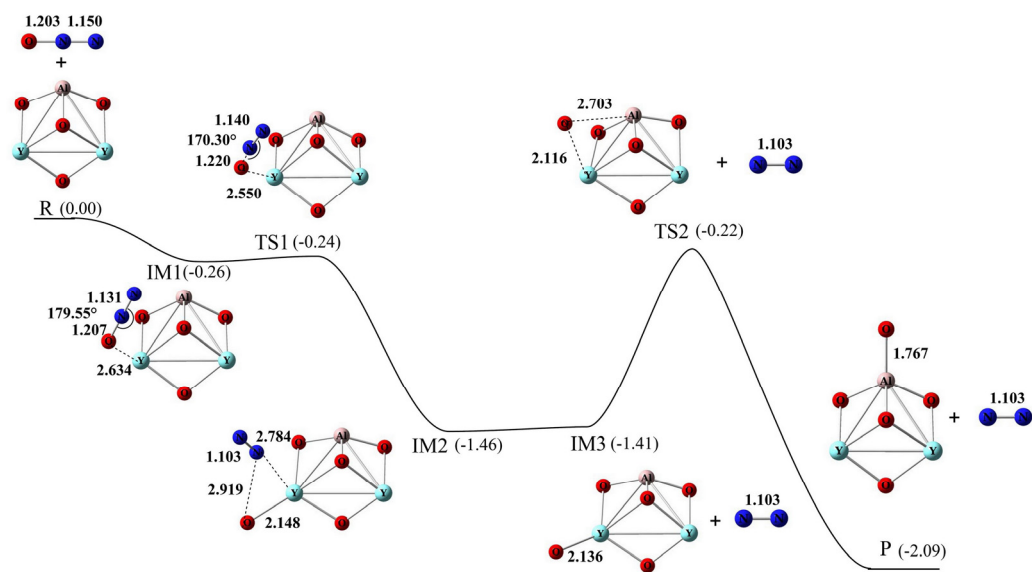

Fig. S12

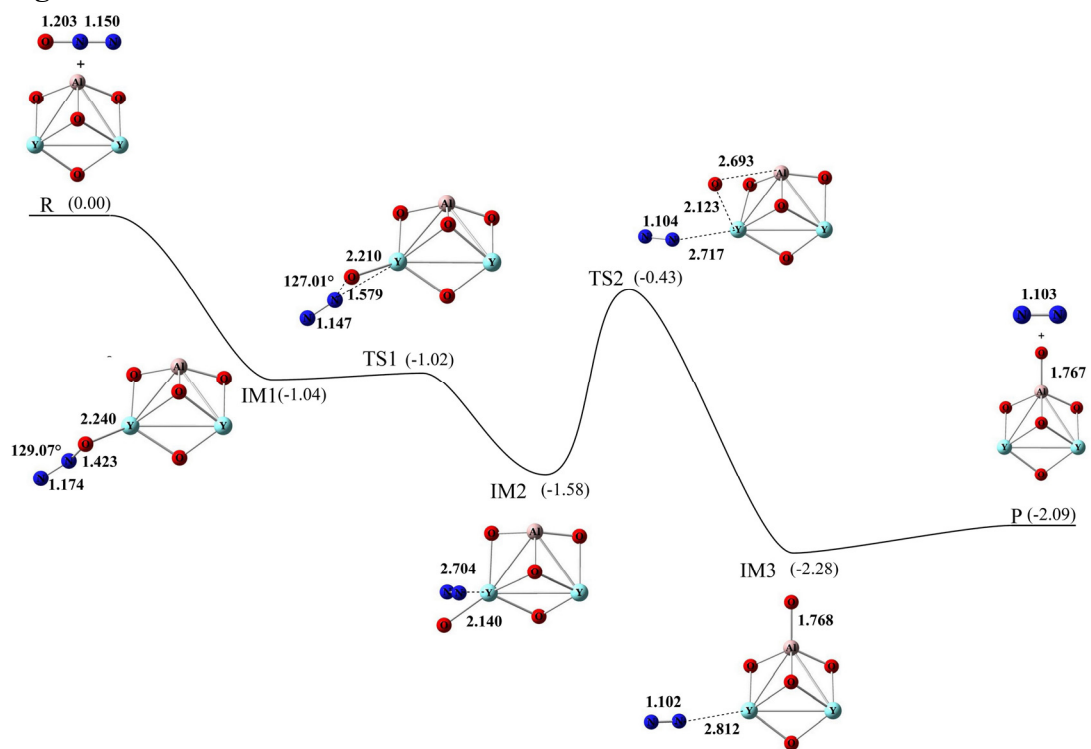



**Table S1**

|                                 | State                                            | BP86 <sup>a,b</sup> | CCSD(T) <sup>a,c</sup> |
|---------------------------------|--------------------------------------------------|---------------------|------------------------|
| Y <sub>2</sub> AlO <sub>4</sub> | (C <sub>s</sub> , <sup>2</sup> A')               | 0.00                | 0.00                   |
|                                 | (C <sub>2v</sub> , <sup>2</sup> A <sub>1</sub> ) | 0.02                | 0.12                   |
| Y <sub>2</sub> AlO <sub>5</sub> | (C <sub>s</sub> , <sup>2</sup> A'')              | 0.00                | 0.00                   |
|                                 | (C <sub>2v</sub> , <sup>2</sup> B <sub>2</sub> ) | 0.08                | 0.23                   |
|                                 | (C <sub>s</sub> , <sup>2</sup> A')               | 0.12                | 0.08                   |

<sup>a</sup> All energies are in eV.

<sup>b</sup> At the BP86/Y/Stuttgart+2f1g/O/Al/aug-cc-pVTZ level.

<sup>c</sup> Single point CCSD(T) energy using BP86 results within 0.20 eV .

**Table S2****Y<sub>3</sub>O<sub>4</sub> C<sub>3v</sub> (<sup>2</sup>A<sub>1</sub> 0.00 eV)**

|   |           |           |           |
|---|-----------|-----------|-----------|
| Y | 0.000000  | 1.832621  | 0.068639  |
| Y | -1.587097 | -0.916311 | 0.068639  |
| Y | 1.587097  | -0.916311 | 0.068639  |
| O | -1.664655 | 0.961089  | -0.747240 |
| O | 1.664655  | 0.961089  | -0.747240 |
| O | 0.000000  | -1.922178 | -0.747240 |
| O | 0.000000  | 0.000000  | 1.237876  |

**Y<sub>3</sub>O<sub>5</sub> C<sub>s</sub> (<sup>2</sup>A'' 0.00 eV)**

|   |           |           |           |
|---|-----------|-----------|-----------|
| Y | 0.649603  | 1.553103  | 0.000000  |
| Y | -0.413401 | -1.035704 | 1.576317  |
| Y | -0.413401 | -1.035704 | -1.576317 |
| O | 0.992287  | -0.730349 | 0.000000  |
| O | 2.312744  | 2.924094  | 0.000000  |
| O | -1.614386 | -1.589437 | 0.000000  |
| O | -0.413401 | 0.961215  | -1.739572 |
| O | -0.413401 | 0.961215  | 1.739572  |

**Y<sub>3</sub>O<sub>5</sub> C<sub>s</sub> (<sup>2</sup>A' 0.11 eV)**

|   |           |           |           |
|---|-----------|-----------|-----------|
| Y | 0.686435  | 1.529567  | 0.000000  |
| Y | -0.433297 | -1.024520 | 1.579013  |
| Y | -0.433297 | -1.024520 | -1.579013 |
| O | 0.990778  | -0.719381 | 0.000000  |
| O | 2.378372  | 2.908171  | 0.000000  |
| O | -1.624280 | -1.588585 | 0.000000  |
| O | -0.433297 | 0.966115  | -1.722040 |
| O | -0.433297 | 0.966115  | 1.722040  |

**Y<sub>3</sub>O<sub>5</sub> C<sub>s</sub> (<sup>2</sup>A' 0.21 eV)**

|   |           |           |           |
|---|-----------|-----------|-----------|
| Y | 0.229440  | -0.828589 | 1.505504  |
| Y | 0.229440  | -0.828589 | -1.505504 |
| Y | -0.689824 | 1.820390  | 0.000000  |
| O | -1.253061 | -0.206738 | 0.000000  |
| O | 1.677724  | -0.682444 | 0.000000  |
| O | 0.242312  | -2.462883 | 0.000000  |
| O | 0.229440  | 1.278202  | 1.745314  |
| O | 0.229440  | 1.278202  | -1.745314 |

**Y<sub>2</sub>AlO<sub>4</sub> C<sub>s</sub> (<sup>2</sup>A' 0.00 eV)**

|    |           |           |           |
|----|-----------|-----------|-----------|
| Y  | 0.000000  | 1.509314  | -0.533837 |
| Y  | 0.000000  | -1.509314 | -0.533837 |
| Al | 0.000000  | 0.000000  | 2.394290  |
| O  | -1.346215 | 0.000000  | -0.880541 |
| O  | 1.346215  | 0.000000  | -0.880541 |
| O  | 0.000000  | -1.509716 | 1.537634  |
| O  | 0.000000  | 1.509716  | 1.537634  |

**Y<sub>2</sub>AlO<sub>4</sub> C<sub>2v</sub> (<sup>2</sup>A<sub>1</sub> 0.02 eV)**

|    |           |           |           |
|----|-----------|-----------|-----------|
| Y  | -0.113324 | -0.477844 | 1.575410  |
| Y  | -0.113324 | -0.477844 | -1.575410 |
| Al | 0.791409  | 1.744819  | 0.000000  |
| O  | -0.113324 | 1.541741  | 1.527950  |
| O  | -1.266194 | -1.107841 | 0.000000  |
| O  | -0.113324 | 1.541741  | -1.527950 |
| O  | 1.311712  | -0.151989 | 0.000000  |

**Y<sub>2</sub>AlO<sub>5</sub> C<sub>s</sub> (<sup>2</sup>A" 0.00 eV)**

|    |           |           |           |
|----|-----------|-----------|-----------|
| Y  | -0.240640 | -0.654302 | 1.572057  |
| Y  | -0.240640 | -0.654302 | -1.572057 |
| Al | 0.667247  | 1.571726  | 0.000000  |
| O  | -1.395315 | -1.298018 | 0.000000  |
| O  | -0.240640 | 1.355313  | -1.517925 |
| O  | 1.166973  | -0.351300 | 0.000000  |
| O  | -0.240640 | 1.355313  | 1.517925  |
| O  | 1.971583  | 2.764082  | 0.000000  |

**Y<sub>2</sub>AlO<sub>5</sub> C<sub>2v</sub> (<sup>2</sup>B<sub>2</sub> 0.08 eV)**

|    |           |           |           |
|----|-----------|-----------|-----------|
| Y  | 0.000000  | 1.510745  | -0.785597 |
| Y  | 0.000000  | -1.510745 | -0.785597 |
| Al | 0.000000  | 0.000000  | 2.128669  |
| O  | -1.343799 | 0.000000  | -1.127560 |
| O  | 1.343799  | 0.000000  | -1.127560 |
| O  | 0.000000  | -1.499763 | 1.285964  |
| O  | 0.000000  | 1.499763  | 1.285964  |
| O  | 0.000000  | 0.000000  | 3.883672  |

**Y<sub>2</sub>AlO<sub>5</sub> C<sub>s</sub> (<sup>2</sup>A' 0.12 eV)**

|    |           |           |           |
|----|-----------|-----------|-----------|
| Y  | -0.263241 | -0.631011 | 1.576272  |
| Y  | -0.263241 | -0.631011 | -1.576272 |
| Al | 0.703892  | 1.542968  | 0.000000  |
| O  | -1.403161 | -1.289491 | 0.000000  |
| O  | -0.263241 | 1.367731  | -1.493074 |
| O  | 1.171941  | -0.345683 | 0.000000  |
| O  | -0.263241 | 1.367731  | 1.493074  |
| O  | 2.180483  | 2.544748  | 0.000000  |

**Y<sub>2</sub>AlO<sub>5</sub> C<sub>2v</sub> (<sup>2</sup>B<sub>1</sub> 0.31 eV)**

|    |           |           |           |
|----|-----------|-----------|-----------|
| Y  | 0.000000  | 1.511646  | -0.790424 |
| Y  | 0.000000  | -1.511646 | -0.790424 |
| Al | 0.000000  | 0.000000  | 2.167482  |
| O  | -1.344735 | 0.000000  | -1.144942 |
| O  | 1.344735  | 0.000000  | -1.144942 |
| O  | 0.000000  | -1.477930 | 1.272313  |
| O  | 0.000000  | 1.477930  | 1.272313  |
| O  | 0.000000  | 0.000000  | 3.929737  |

**Table S3****Cartesian coordinates for the reaction of  $Y_3O_5$  with CO as shown in Fig. 5****IM1**

|   |           |           |           |
|---|-----------|-----------|-----------|
| Y | -1.300913 | -0.000021 | 0.290210  |
| Y | 1.496036  | -1.573361 | -0.032044 |
| Y | 1.495994  | 1.573382  | -0.032053 |
| O | 0.850426  | 0.000008  | 1.239131  |
| O | -2.965060 | 0.000044  | 1.700273  |
| O | 2.329900  | 0.000011  | -1.066102 |
| O | -0.436025 | 1.752324  | -0.542542 |
| O | -0.435990 | -1.752347 | -0.542527 |
| C | -3.698746 | -0.000023 | -0.949144 |
| O | -4.813389 | -0.000025 | -1.178675 |

**TS1**

|   |           |           |           |
|---|-----------|-----------|-----------|
| Y | 1.294041  | -0.114906 | 0.155965  |
| Y | -1.414383 | 1.629968  | 0.054903  |
| Y | -1.602369 | -1.511324 | -0.030571 |
| O | -0.771529 | -0.020985 | 1.236784  |
| O | 3.021160  | -0.290117 | 1.502080  |
| O | -2.418039 | 0.139357  | -0.950399 |
| O | 0.275937  | -1.776944 | -0.681823 |
| O | 0.478523  | 1.702442  | -0.592789 |
| C | 3.813943  | 0.115153  | -0.752926 |
| O | 4.951707  | 0.141661  | -0.828106 |

**IM2**

|   |           |           |           |
|---|-----------|-----------|-----------|
| Y | -1.269968 | -0.000001 | -0.248737 |
| Y | 1.501327  | -1.574069 | 0.137954  |

|   |           |           |           |
|---|-----------|-----------|-----------|
| Y | 1.501326  | 1.574070  | 0.137955  |
| O | 0.517868  | 0.000000  | 1.194188  |
| O | -3.137306 | -0.000009 | 1.126627  |
| O | 2.598255  | 0.000001  | -0.597849 |
| O | -0.217463 | 1.704522  | -0.884551 |
| O | -0.217463 | -1.704523 | -0.884552 |
| C | -3.892374 | 0.000001  | 0.099125  |
| O | -5.071447 | 0.000007  | -0.160671 |

### **TS2**

|   |           |           |           |
|---|-----------|-----------|-----------|
| Y | -1.231733 | -0.261615 | 0.376416  |
| Y | 1.241099  | 1.708002  | -0.144821 |
| Y | 1.689350  | -1.410767 | -0.245804 |
| O | 0.383676  | 0.020180  | -1.168254 |
| O | -3.289831 | -1.010884 | -0.349990 |
| O | 2.623344  | 0.291317  | 0.413896  |
| O | 0.108720  | -1.786289 | 0.927416  |
| O | -0.353122 | 1.541077  | 1.041623  |
| C | -3.819384 | 0.154356  | -0.311938 |
| O | -4.889484 | 0.655183  | -0.561467 |

### **IM3**

|   |           |           |           |
|---|-----------|-----------|-----------|
| Y | -1.287401 | -0.000009 | -0.436042 |
| Y | 1.456506  | -1.572273 | 0.124858  |
| Y | 1.456495  | 1.572274  | 0.124859  |
| O | 0.410764  | -0.000003 | 1.116723  |
| O | -4.498431 | 0.000016  | 1.578628  |
| O | 2.600341  | 0.000005  | -0.539511 |
| O | -0.192377 | 1.696408  | -1.011228 |

|   |           |           |           |
|---|-----------|-----------|-----------|
| O | -0.192365 | -1.696419 | -1.011227 |
| C | -3.667984 | 0.000004  | 0.702037  |
| O | -3.608196 | -0.000002 | -0.569129 |

### **TS3**

|   |           |           |           |
|---|-----------|-----------|-----------|
| Y | 0.260811  | 1.537600  | 0.000000  |
| Y | -0.814703 | -0.993262 | 1.591096  |
| Y | -0.814703 | -0.993262 | -1.591096 |
| O | 0.627564  | -0.605410 | 0.000000  |
| O | 2.762490  | 1.744278  | 0.000000  |
| O | -1.959290 | -1.588664 | 0.000000  |
| O | -0.814703 | 1.058211  | -1.677889 |
| O | -0.814703 | 1.058211  | 1.677889  |
| C | 3.431879  | 0.748273  | 0.000000  |
| O | 4.296632  | -0.039327 | 0.000000  |

### **IM4**

|   |           |           |           |
|---|-----------|-----------|-----------|
| Y | 1.038307  | -0.000020 | -1.250796 |
| Y | -1.154115 | 1.594777  | 0.412616  |
| Y | -1.154138 | -1.594758 | 0.412641  |
| O | 0.301674  | 0.000002  | 0.795655  |
| O | 3.209833  | -0.000008 | 0.158650  |
| O | -2.435921 | 0.000018  | 0.358711  |
| O | -0.127225 | -1.672481 | -1.372084 |
| O | -0.127200 | 1.672456  | -1.372111 |
| C | 3.076795  | 0.000004  | 1.339229  |
| O | 3.062232  | 0.000016  | 2.501260  |

**Cartesian coordinates for the reaction of  $Y_2AlO_5$  with CO as shown in Fig. 6**

**IM1**

|    |           |           |           |
|----|-----------|-----------|-----------|
| Y  | -1.460099 | -1.353735 | -0.247119 |
| Y  | -0.695908 | 1.709327  | -0.109700 |
| Al | 1.089306  | -0.395117 | 0.564051  |
| O  | -2.285157 | 0.457963  | 0.247058  |
| O  | 0.722375  | 1.208951  | 1.219843  |
| O  | 0.067428  | -0.070600 | -1.041038 |
| O  | 0.023993  | -1.719447 | 1.061138  |
| O  | 2.811503  | -0.853676 | 0.309400  |
| C  | 3.566917  | -0.027068 | -0.378161 |
| O  | 4.725084  | -0.094334 | -0.689872 |

**TS1**

|    |           |           |           |
|----|-----------|-----------|-----------|
| Y  | 1.945713  | -0.848974 | 0.098356  |
| Y  | 0.042791  | 1.722751  | 0.071907  |
| Al | -0.845885 | -0.971463 | -0.112884 |
| O  | 1.839694  | 1.047395  | -0.648623 |
| O  | -1.467877 | 0.547038  | -0.796200 |
| O  | 0.204277  | -0.149649 | 1.183405  |
| O  | 0.435900  | -1.950730 | -0.766383 |
| O  | -2.550164 | -1.593656 | 0.348901  |
| C  | -3.248795 | -0.578067 | 0.053370  |
| O  | -4.344624 | -0.147884 | -0.007722 |

**IM2**

|    |           |           |          |
|----|-----------|-----------|----------|
| Y  | 2.061034  | -0.577122 | 0.012468 |
| Y  | -0.241124 | 1.646378  | 0.107655 |
| Al | -0.674706 | -1.305730 | 0.138918 |



|   |           |           |           |
|---|-----------|-----------|-----------|
| O | 1.517309  | 1.250587  | -0.774502 |
| O | -1.717175 | 0.120494  | -0.651451 |
| O | 0.240945  | -0.129034 | 1.202327  |
| O | 0.710868  | -2.004360 | -0.621442 |
| O | -2.405501 | -1.721565 | 0.400462  |
| C | -2.854231 | -0.579641 | -0.159312 |
| O | -3.981437 | -0.172200 | -0.247255 |

### **TS2**

|    |           |           |           |
|----|-----------|-----------|-----------|
| Y  | 2.092867  | 0.061079  | -0.122191 |
| Y  | -0.776147 | -1.283618 | -0.048632 |
| Al | -0.232379 | 1.795961  | -0.063565 |
| O  | 1.105589  | -1.544609 | 0.703094  |
| O  | -1.313134 | 0.630526  | 1.022722  |
| O  | 0.174140  | 0.257875  | -1.161514 |
| O  | 1.380912  | 1.771320  | 0.684797  |
| O  | -2.598314 | 1.825597  | -0.370919 |
| C  | -2.432096 | 0.711524  | 0.171802  |
| O  | -2.966516 | -0.432909 | -0.070974 |

### **IM3**

|    |           |           |           |
|----|-----------|-----------|-----------|
| Y  | -2.163187 | -0.003450 | -0.174161 |
| Y  | 0.757980  | -1.159649 | 0.251987  |
| Al | -0.058291 | 1.800051  | 0.604333  |
| O  | -0.883811 | -1.405818 | -0.946717 |
| O  | 2.862571  | -0.691278 | -0.283150 |
| O  | -0.612311 | 0.113250  | 1.338907  |
| O  | -1.433465 | 1.842083  | -0.525912 |
| O  | 1.357933  | 0.945341  | -0.226948 |

|   |          |          |           |
|---|----------|----------|-----------|
| C | 2.751031 | 0.618854 | -0.340290 |
| O | 3.590912 | 1.477310 | -0.462405 |

### **TS3**

|    |           |           |           |
|----|-----------|-----------|-----------|
| Y  | 2.101969  | 0.098267  | -0.603367 |
| Y  | -0.658170 | -1.085438 | 0.357094  |
| Al | 0.117163  | 1.653105  | 0.778365  |
| O  | 1.332570  | -1.619250 | 0.193288  |
| O  | -0.805497 | 0.424733  | 1.698680  |
| O  | 0.019466  | 0.565670  | -0.858053 |
| O  | 1.900449  | 1.540361  | 0.802167  |
| O  | -3.972854 | 1.513702  | -0.801391 |
| C  | -3.506515 | 0.456015  | -0.683626 |
| O  | -3.073158 | -0.641061 | -0.586239 |

### **IM4**

|    |           |           |           |
|----|-----------|-----------|-----------|
| Y  | 1.727850  | 0.719583  | -0.581190 |
| Y  | -0.790073 | -1.179948 | -0.355570 |
| Al | 0.502573  | 0.017590  | 1.930995  |
| O  | 0.949542  | -0.965655 | -1.442241 |
| O  | -0.289144 | -1.543719 | 1.568459  |
| O  | -0.239372 | 0.829819  | 0.286299  |
| O  | 2.171569  | 0.245794  | 1.331190  |
| O  | -2.871591 | 2.438506  | 0.248161  |
| C  | -2.856274 | 1.330201  | -0.099083 |
| O  | -2.967141 | 0.213300  | -0.488717 |

**Cartesian coordinates for the reaction of  $Y_3O_4$  with  $N_2O$  as shown in Fig. 8**

### **IM1**

|   |           |           |           |
|---|-----------|-----------|-----------|
| Y | -0.703555 | -1.263743 | 1.572152  |
| Y | -0.703555 | -1.263743 | -1.572152 |
| Y | 0.397977  | 1.313840  | 0.000000  |
| O | -1.900022 | -1.829165 | 0.000000  |
| O | -0.703555 | 0.736972  | 1.698239  |
| O | -0.703555 | 0.736972  | -1.698239 |
| O | 0.710495  | -0.970808 | 0.000000  |
| N | 3.907065  | 2.400645  | 0.000000  |
| N | 2.739531  | 2.242899  | 0.000000  |
| O | 1.700390  | 3.179448  | 0.000000  |

### **TS1**

|   |           |           |           |
|---|-----------|-----------|-----------|
| Y | 1.719274  | -1.319569 | 0.393000  |
| Y | 1.074457  | 1.745367  | 0.054436  |
| Y | -1.226862 | -0.417148 | -0.502121 |
| O | 2.572428  | 0.395823  | -0.349956 |
| O | 0.242899  | -1.900399 | -0.828533 |
| O | -0.442357 | 1.417097  | -1.206320 |
| O | 0.282831  | 0.077378  | 1.142358  |
| N | -4.409241 | 0.683421  | 1.301616  |
| N | -3.483946 | 0.316618  | 0.734325  |
| O | -3.387751 | -0.907102 | -0.272409 |

### **IM2**

|   |           |           |           |
|---|-----------|-----------|-----------|
| Y | 1.860467  | -1.056664 | 0.534867  |
| Y | 0.752061  | 1.804185  | -0.157997 |
| Y | -1.178726 | -0.752800 | -0.488202 |
| O | 2.446624  | 0.667897  | -0.419349 |
| O | 0.520164  | -2.007235 | -0.611021 |

|   |           |           |           |
|---|-----------|-----------|-----------|
| O | -0.692661 | 1.124889  | -1.365741 |
| O | 0.224232  | 0.177512  | 1.124960  |
| N | -4.082742 | 1.192262  | 1.461800  |
| N | -3.174481 | 0.792715  | 0.979297  |
| O | -3.138079 | -1.674184 | -0.322065 |

**Cartesian coordinates for the reaction of  $Y_2AlO_4$  with  $N_2O$  as shown in Fig. 9**

**IM1**

|    |           |           |           |
|----|-----------|-----------|-----------|
| Y  | -1.100591 | 1.573271  | -0.056118 |
| Y  | -1.100536 | -1.573300 | -0.056093 |
| Al | 1.229765  | 0.000032  | 0.504647  |
| O  | 0.868184  | 1.496608  | -0.408000 |
| O  | -1.942708 | -0.000039 | -1.075217 |
| O  | 0.868238  | -1.496570 | -0.407975 |
| O  | -0.575503 | 0.000005  | 1.298261  |
| O  | 2.345031  | 0.000076  | 1.897002  |
| N  | 4.572385  | -0.000053 | -1.179407 |
| N  | 3.620627  | 0.000065  | -0.622990 |

**Cartesian coordinates for  $CO$ ,  $CO_2$ ,  $N_2O$  and  $N_2$**

**CO**

|   |          |          |           |
|---|----------|----------|-----------|
| C | 0.000000 | 0.000000 | -0.650176 |
| O | 0.000000 | 0.000000 | 0.487632  |

**CO<sub>2</sub>**

|   |          |          |           |
|---|----------|----------|-----------|
| C | 0.000000 | 0.000000 | 0.000000  |
| O | 0.000000 | 0.000000 | 1.172549  |
| O | 0.000000 | 0.000000 | -1.172549 |

**N<sub>2</sub>O**

|   |          |          |           |
|---|----------|----------|-----------|
| N | 0.000000 | 0.000000 | -1.209493 |
| N | 0.000000 | 0.000000 | -0.071388 |
| O | 0.000000 | 0.000000 | 1.120772  |

**N<sub>2</sub>**

|   |          |          |           |
|---|----------|----------|-----------|
| N | 0.000000 | 0.000000 | 0.551597  |
| N | 0.000000 | 0.000000 | -0.551597 |
